# Supplementary material
Source: MDPI journal article supplement (https://www.mdpi.com/2227-9717/9/9/1503)
Supplement: s1 [file s1]

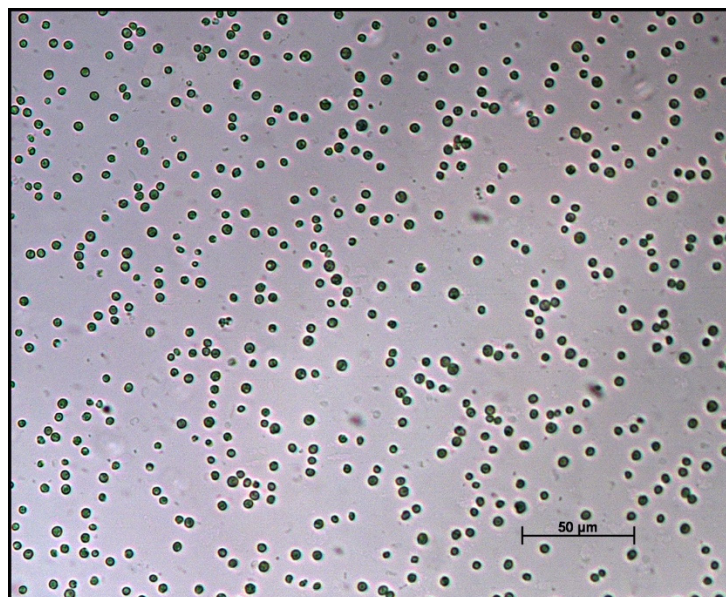

**Figure S1.** Optical photomicrograph of the consortium.

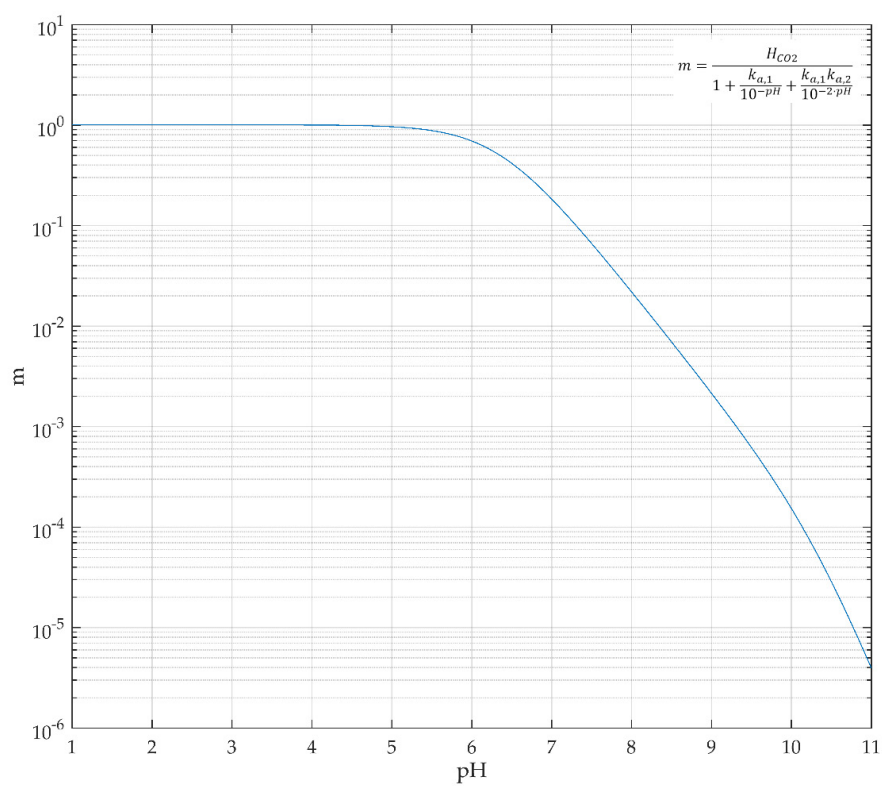

**Figure S2.** Variation in gas-liquid equilibrium constant as a function of pH.

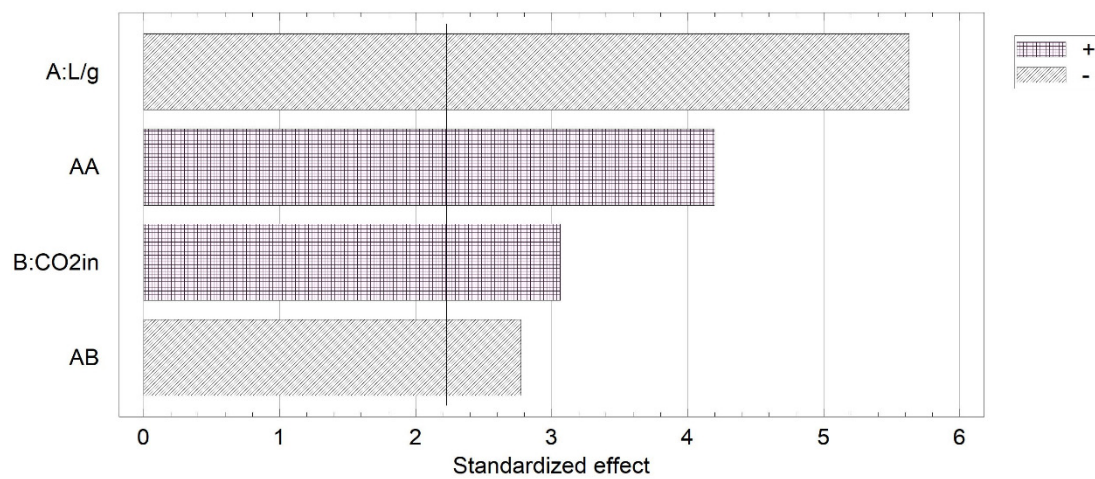

**Figure S3.** Standardized Pareto Chart for outlet CO<sub>2</sub> empirical model.
